# Supplementary material
Source: MDPI journal article supplement (https://www.mdpi.com/2304-6775/12/1/2)

Type/token ratio

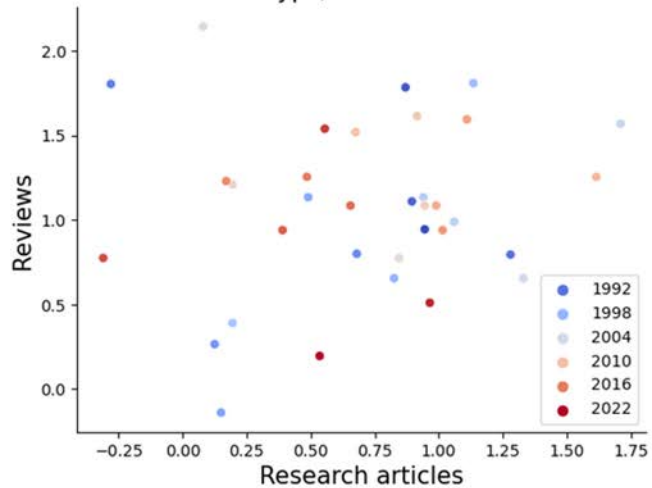

Attributive adjectives

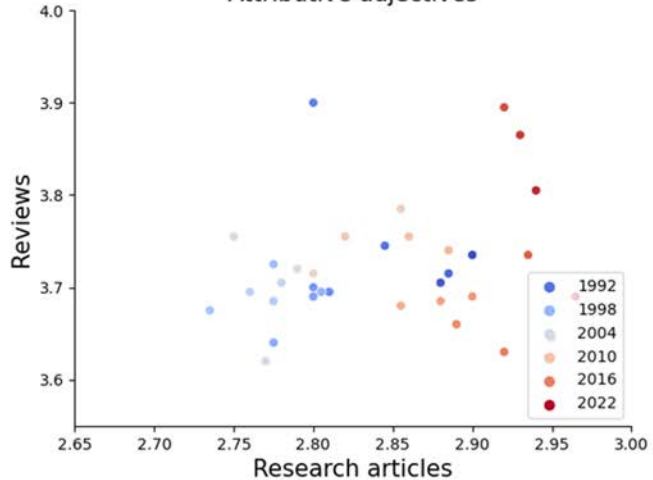

Supplement: s1 [file s1]
